# Supplementary material for: Pulmonary Pharmacokinetic and Pharmacodynamic Evaluation of Ampicillin/Sulbactam Regimens for Pneumonia Caused by Various Bacteria, including Acinetobacter baumannii
Source: MDPI journal article supplement (doi:10.3390/antibiotics12020303), 2023-02-02
Supplement: s1 [file s1]

Table S1 Demographic information of literature data used in this study

|                            | PK parameter in blood concentrations<br>• Onita T et al. [19])                                                                                                 | Calculation of $KP_{lung}$<br>• Frank U et al. [16]    | Physiological parameter<br>• Langdon G et al. [24]<br>• Brown RP et al. [25] |
|----------------------------|----------------------------------------------------------------------------------------------------------------------------------------------------------------|--------------------------------------------------------|------------------------------------------------------------------------------|
| The number of the subjects | N = 44 (All males)                                                                                                                                             | N = 15 (12 males and 3 females)                        | NA                                                                           |
| Subject characteristics    | Male patients performed transurethral resection of the prostate                                                                                                | Patients undergoing thoracic surgery for pneumonectomy | Healthy subjects                                                             |
| Age (years)                | Ampicillin/sulbactam 1.5g group: $71.4 \pm 6.1$<br>Ampicillin/sulbactam 3.0g group: $73.2 \pm 5.2$                                                             | 59.5 (Mean value)                                      | Males: 25-35                                                                 |
| Body weight (kg)           | Ampicillin/sulbactam 1.5g group: $62.1 \pm 9.0$<br>Ampicillin/sulbactam 3.0g group: $59.7 \pm 10.2$                                                            | 72.5 (Mean value)                                      | Males: $71.7 \pm 10$                                                         |
| Renal function             | Ampicillin/sulbactam 1.5g group: $CL_{cr}^a$ , $73.3 \pm 21.3$ (mL/min)<br>Ampicillin/sulbactam 3.0g group: $CL_{cr}^a$ , $68.9 \pm 23.2$ (mL/min)             | Normal renal function<br>(values not shown)            | NA                                                                           |
| Hepatic function           | Ampicillin/sulbactam 1.5g group: T-bil <sup>b</sup> , $0.70 \pm 0.26$ (mg/dL)<br>Ampicillin/sulbactam 3.0g group: T-bil <sup>b</sup> , $0.68 \pm 0.20$ (mg/dL) | Normal hepatic function<br>(values not shown)          | NA                                                                           |

NA; Not applicable    a, CL<sub>cr</sub>; Creatinine clearance b, T-bil; Total bilirubin
